# Supplementary material for: High-throughput screening of single atom co-catalysts in ZnIn2S4 for photocatalysis
Source: Royal Society of Chemistry journal article supplement (doi:10.1039/d4ma00616j), 2024-01-01
Supplement: d4ma00616j3.pdf [file d4ma00616j3.pdf]

## Supplemental material to "High Throughput Screening of Single Atom Co-Catalysts in ZnIn<sub>2</sub>S<sub>4</sub> for Photocatalysis"

Md Habibur Rahman,<sup>1)</sup> Yujie Sun<sup>2)</sup> and Arun Mannodi-Kanakkithodi<sup>1, a)</sup>

<sup>1</sup>School of Materials Engineering, Purdue University, West Lafayette, Indiana 47907, USA

<sup>2</sup>Department of Chemistry, University of Cincinnati, Cincinnati, OH 45221 USA

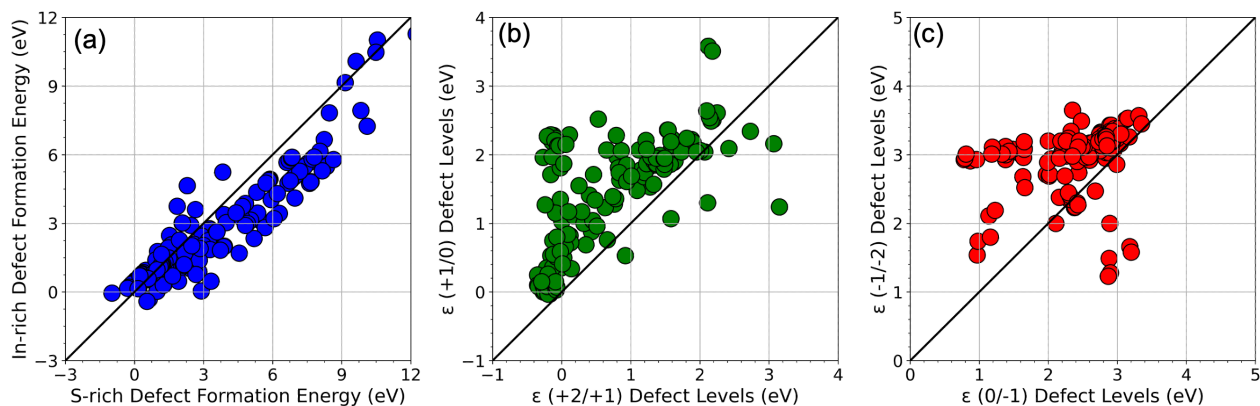

**Fig. S1** Visualization of GGA+U DFT data—(a) Cation (In) vs anion(S) defect rich formation energy, (b) +2/+1 vs +1/0 and (c) 0/-1 vs -1/-2 defect levels.

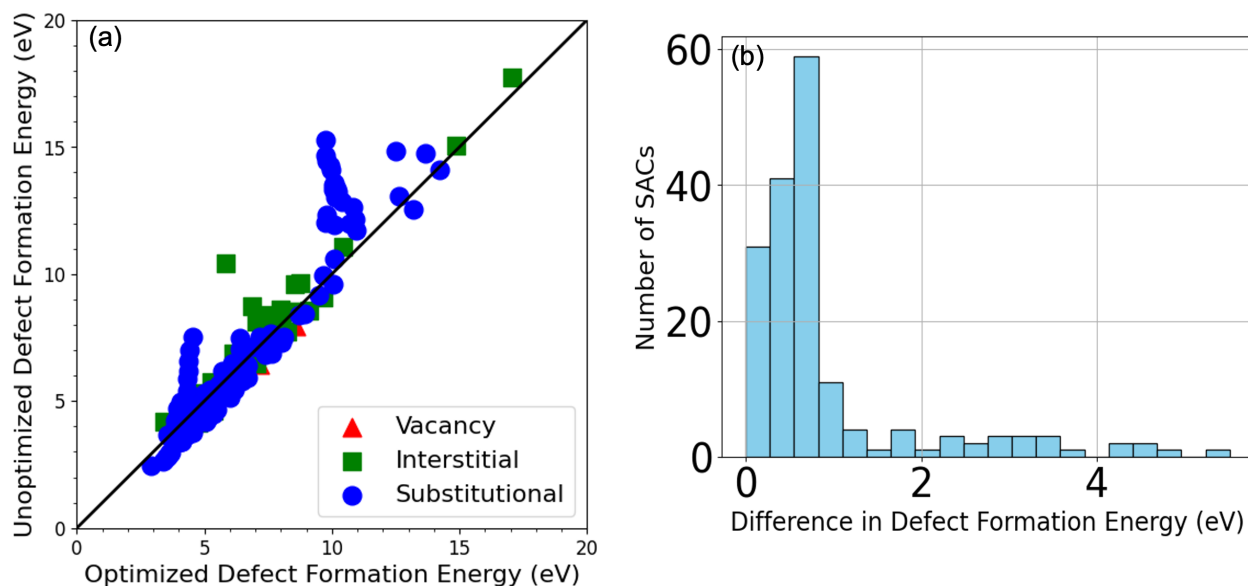

**Fig. S2** (a) DFT optimized vs unoptimized defect formation energy (DFE) (b) Distribution of DFE difference (DFT optimized – DFT unoptimized) for SACs.

### A Chemical Potential Expressions for SACs

<sup>a</sup>amannodi@purdue.edu

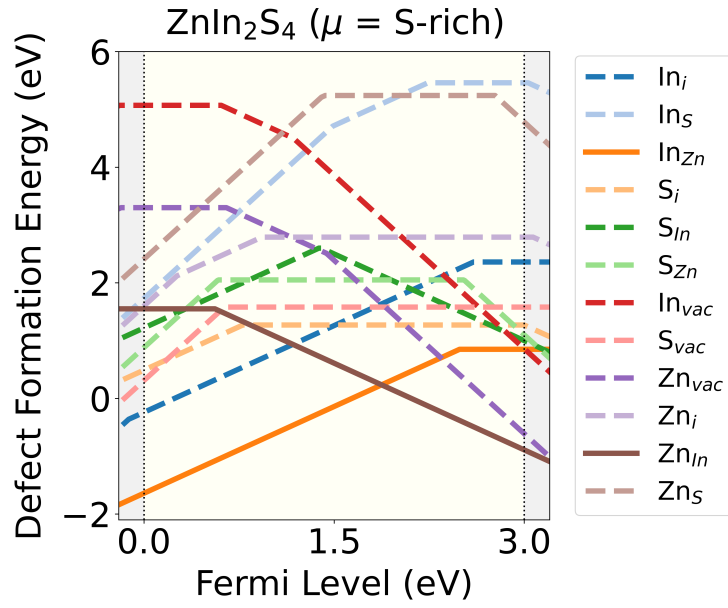

**Fig. S3** DFE of all the native defects in ZIS as a function of  $E_F$  using HSE06 functional under S-rich conditions. The lowest energy donor and acceptor are depicted with solid line.

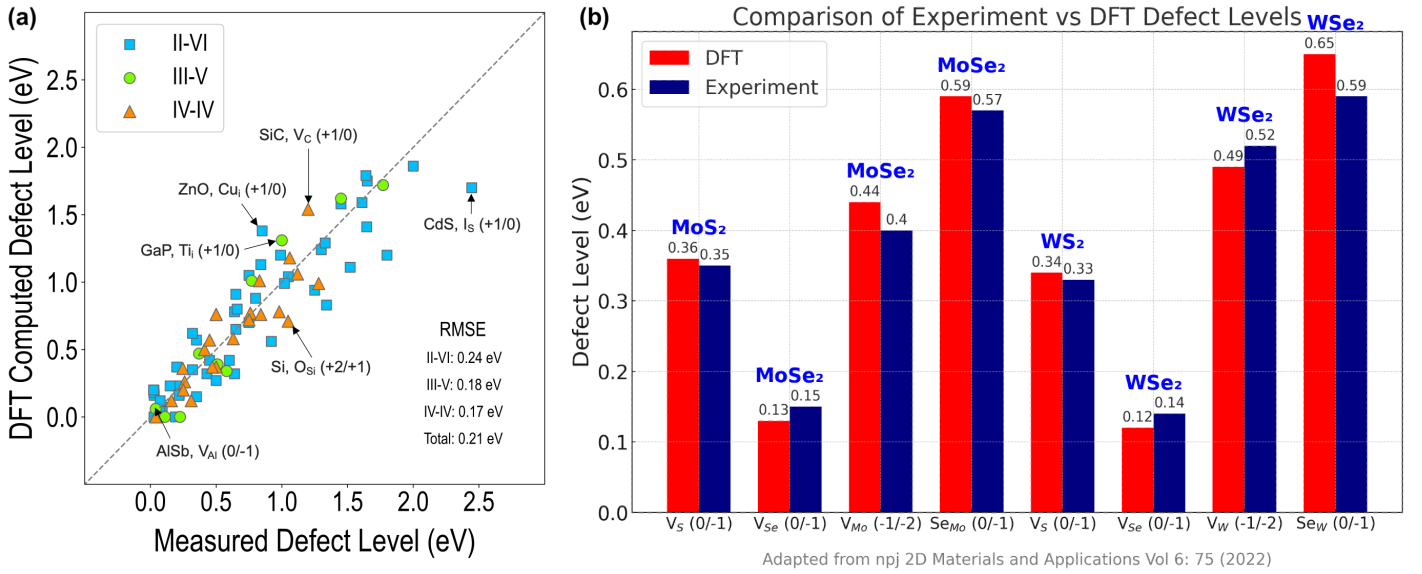

**Fig. S4** Comparison of defect levels between DFT calculations and experimental observations for various (a) binary zinc blende (ZB) semiconductors and (b) transition metal dichalcogenide (TMDC) semiconductors. Collected from prior literature<sup>52,53</sup>. Permission to reuse Fig. S4(a) has been obtained from Elsevier.

$$\Delta\mu_{Sc} + 2\Delta\mu_S = \Delta H(\text{ScS}_2)$$

$$\Delta\mu_{Cr} + 2\Delta\mu_S = \Delta H(\text{CrS}_2)$$

$$\Delta\mu_{Co} + 2\Delta\mu_S = \Delta H(\text{CoS}_2)$$

$$\Delta\mu_{Ti} + 2\Delta\mu_S = \Delta H(\text{TiS}_2)$$

$$\Delta\mu_{Mn} + 2\Delta\mu_S = \Delta H(\text{MnS}_2)$$

$$\Delta\mu_{Ni} + 2\Delta\mu_S = \Delta H(\text{NiS}_2)$$

$$\Delta\mu_V + 2\Delta\mu_S = \Delta H(\text{VS}_2)$$

$$\Delta\mu_{Fe} + \Delta\mu_S = \Delta H(\text{FeS})$$

$$\Delta\mu_{Cu} + \Delta\mu_S = \Delta H(\text{CuS})$$

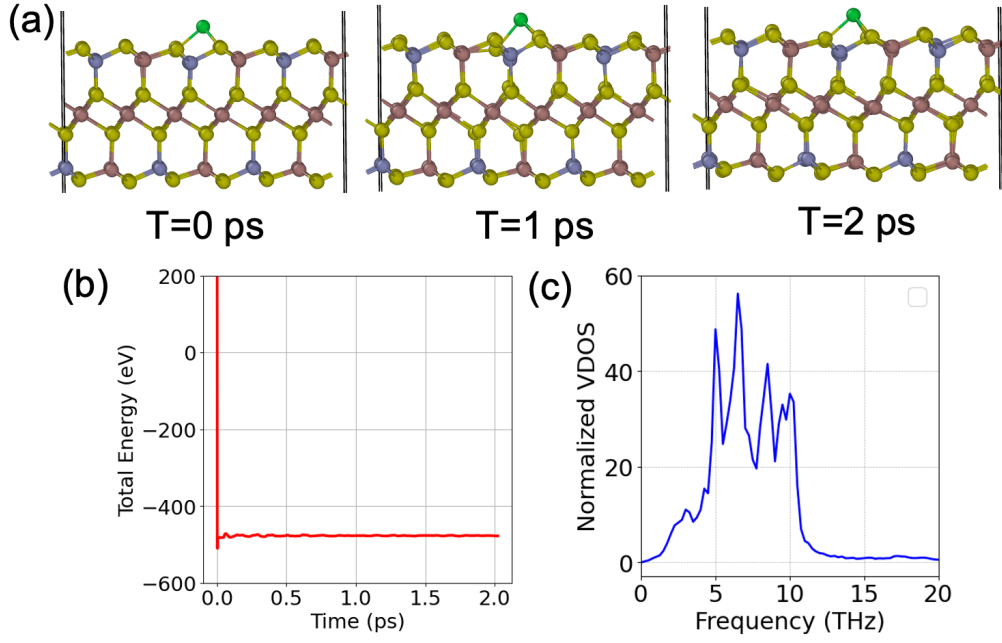

**Fig. S5** (a) Snapshots of the crystal structure of Yb<sub>i</sub> (green color) in ZIS during AIMD simulations at 300 K. (b) Energy profile during the AIMD simulation. (c) Normalized vibrational density of states (VDOS) for Yb<sub>i</sub> in ZIS.

$$\Delta\mu_{\text{Y}} + \Delta\mu_{\text{S}} = \Delta H(\text{YS})$$

$$2\Delta\mu_{\text{Ag}} + \Delta\mu_{\text{S}} = \Delta H(\text{Ag}_2\text{S})$$

$$\Delta\mu_{\text{Dy}} + \Delta\mu_{\text{S}} = \Delta H(\text{DyS})$$

$$\Delta\mu_{\text{Zr}} + \Delta\mu_{\text{S}} = \Delta H(\text{ZrS})$$

$$\Delta\mu_{\text{Cd}} + \Delta\mu_{\text{S}} = \Delta H(\text{CdS})$$

$$\Delta\mu_{\text{Ho}} + \Delta\mu_{\text{S}} = \Delta H(\text{HoS})$$

$$\Delta\mu_{\text{Nb}} + 3\Delta\mu_{\text{S}} = \Delta H(\text{NbS}_3)$$

$$\Delta\mu_{\text{La}} + \Delta\mu_{\text{S}} = \Delta H(\text{LaS})$$

$$\Delta\mu_{\text{Er}} + \Delta\mu_{\text{S}} = \Delta H(\text{ErS})$$

$$\Delta\mu_{\text{Mo}} + 2\Delta\mu_{\text{S}} = \Delta H(\text{MoS}_2)$$

$$\Delta\mu_{\text{Ce}} + \Delta\mu_{\text{S}} = \Delta H(\text{CeS})$$

$$\Delta\mu_{\text{Tm}} + \Delta\mu_{\text{S}} = \Delta H(\text{TmS})$$

$$\Delta\mu_{\text{Pr}} + \Delta\mu_{\text{S}} = \Delta H(\text{PrS})$$

$$\Delta\mu_{\text{Yb}} + \Delta\mu_{\text{S}} = \Delta H(\text{YbS})$$

$$\Delta\mu_{\text{Tc}} + 2\Delta\mu_{\text{S}} = \Delta H(\text{TcS}_2)$$

$$\Delta\mu_{\text{Nd}} + \Delta\mu_{\text{S}} = \Delta H(\text{NdS})$$

$$\Delta\mu_{\text{Lu}} + \Delta\mu_{\text{S}} = \Delta H(\text{LuS})$$

$$\Delta\mu_{\text{Pm}} + \Delta\mu_{\text{S}} = \Delta H(\text{PmS})$$

$$\Delta\mu_{\text{Ru}} + 2\Delta\mu_{\text{S}} = \Delta H(\text{RuS}_2)$$

$$\Delta\mu_{\text{Sm}} + \Delta\mu_{\text{S}} = \Delta H(\text{SmS})$$

$$2\Delta\mu_{\text{Hf}} + \Delta\mu_{\text{S}} = \Delta H(\text{Hf}_2\text{S})$$

$$\Delta\mu_{\text{Rh}} + 2\Delta\mu_{\text{S}} = \Delta H(\text{RhS}_2)$$

$$\Delta\mu_{\text{Eu}} + \Delta\mu_{\text{S}} = \Delta H(\text{EuS})$$

$$3\Delta\mu_{\text{Ta}} + 2\Delta\mu_{\text{S}} = \Delta H(\text{Ta}_3\text{S}_2)$$

$$\Delta\mu_{\text{Gd}} + \Delta\mu_{\text{S}} = \Delta H(\text{GdS})$$

$$\Delta\mu_{\text{Pd}} + 2\Delta\mu_{\text{S}} = \Delta H(\text{PdS}_2)$$

$$\Delta\mu_{\text{Tb}} + \Delta\mu_{\text{S}} = \Delta H(\text{TbS})$$

$$\Delta\mu_{\text{W}} + 2\Delta\mu_{\text{S}} = \Delta H(\text{WS}_2)$$

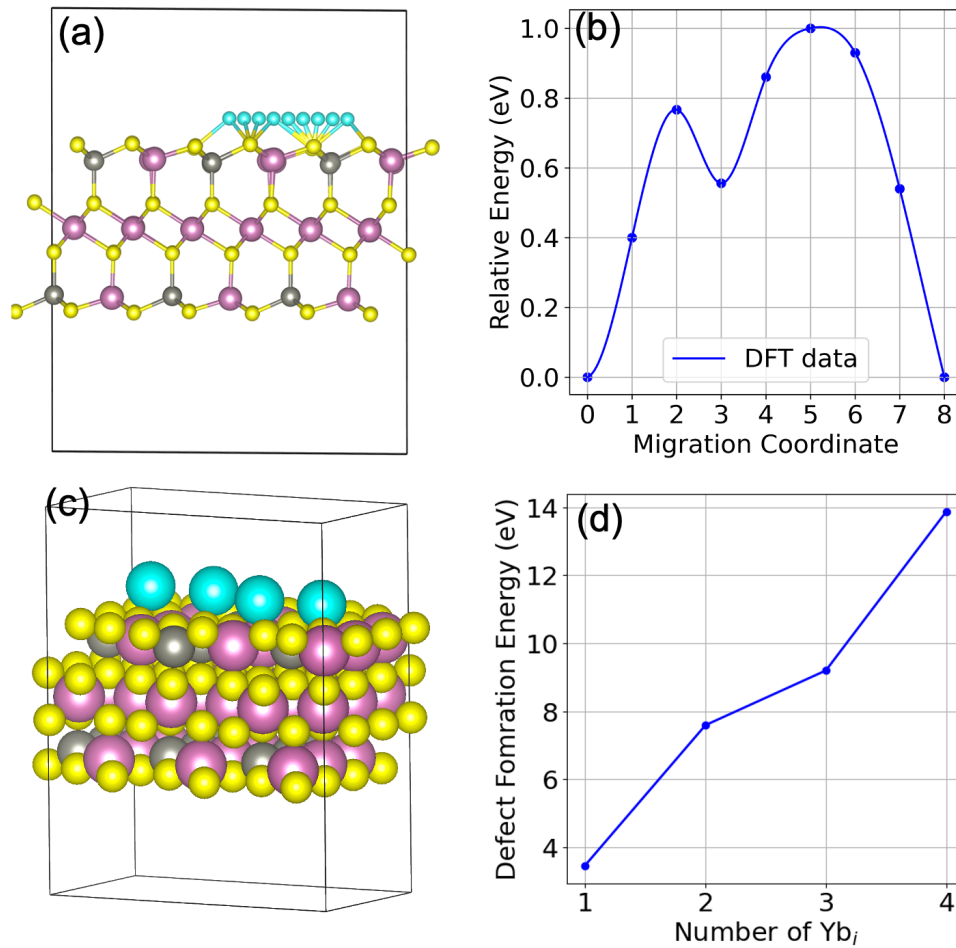

**Fig. S6** (a) Diffusion profile of Yb<sub>i</sub> SAC in ZIS simulated through DFT, (b) DFT calculated migration energy barrier of the same SAC as a function of migration coordinate, (c) cluster of Yb<sub>i</sub> (quadruple) SACs in ZIS, (d) defect formation energy of single, double, triple, and quadruple SACs. Color scheme: In (Pink), Zn (Silver), S (Yellow), and Yb (Cyan).

$$\Delta\mu_{\text{Re}} + 2\Delta\mu_{\text{S}} = \Delta H(\text{ReS}_2) \qquad \Delta\mu_{\text{Ir}} + 2\Delta\mu_{\text{S}} = \Delta H(\text{IrS}_2) \qquad 2\Delta\mu_{\text{Au}} + \Delta\mu_{\text{S}} = \Delta H(\text{Au}_2\text{S})$$

$$\Delta\mu_{\text{Os}} + 2\Delta\mu_{\text{S}} = \Delta H(\text{OsS}_2) \qquad \Delta\mu_{\text{Pt}} + 2\Delta\mu_{\text{S}} = \Delta H(\text{PtS}_2) \qquad \Delta\mu_{\text{Hg}} + \Delta\mu_{\text{S}} = \Delta H(\text{HgS})$$

**Table SI** Gibbs Free Energy of SACs

| Defects          | Gibbs Free Energy (eV) |
|------------------|------------------------|
| Sc <sub>In</sub> | 2.06                   |
| Ti <sub>In</sub> | 0.61                   |
| Co <sub>In</sub> | 0.50                   |
| Y <sub>In</sub>  | 2.14                   |
| Zr <sub>In</sub> | 0.37                   |
| Cd <sub>In</sub> | 0.64                   |
| La <sub>In</sub> | 2.20                   |
| Ce <sub>In</sub> | 1.31                   |
| Pr <sub>In</sub> | 2.18                   |
| Nd <sub>In</sub> | 2.18                   |
| Pm <sub>In</sub> | 2.16                   |
| Sm <sub>In</sub> | 2.16                   |
| Eu <sub>In</sub> | 0.63                   |
| Gd <sub>In</sub> | 2.14                   |
| Tb <sub>In</sub> | 2.14                   |
| Dy <sub>In</sub> | 2.13                   |
| Ho <sub>In</sub> | 2.12                   |
| Er <sub>In</sub> | 2.12                   |
| Tm <sub>In</sub> | 2.11                   |
| Yb <sub>In</sub> | 1.06                   |
| Lu <sub>In</sub> | 2.10                   |
| Hf <sub>In</sub> | 0.32                   |
| Ta <sub>In</sub> | 0.30                   |
| Hg <sub>In</sub> | 0.91                   |
| Sc <sub>Zn</sub> | 0.97                   |
| Mn <sub>Zn</sub> | 1.04                   |
| Ni <sub>Zn</sub> | 0.49                   |
| Y <sub>Zn</sub>  | 0.92                   |
| Tc <sub>Zn</sub> | 0.17                   |
| Cd <sub>Zn</sub> | 2.27                   |
| La <sub>Zn</sub> | 0.81                   |
| Ce <sub>Zn</sub> | 0.85                   |
| Pr <sub>Zn</sub> | 0.83                   |
| Nd <sub>Zn</sub> | 0.86                   |
| Pm <sub>Zn</sub> | 0.89                   |
| Sm <sub>Zn</sub> | 0.90                   |
| Eu <sub>Zn</sub> | 2.20                   |
| Gd <sub>Zn</sub> | 0.92                   |
| Tb <sub>Zn</sub> | 3.37                   |
| Dy <sub>Zn</sub> | 3.37                   |
| Ho <sub>Zn</sub> | 3.37                   |
| Er <sub>Zn</sub> | 0.94                   |
| Tm <sub>Zn</sub> | 0.95                   |
| Yb <sub>Zn</sub> | 2.20                   |
| Lu <sub>Zn</sub> | 0.95                   |
| Hg <sub>Zn</sub> | 2.20                   |
| Ag <sub>S</sub>  | 3.08                   |
| Au <sub>S</sub>  | 0.19                   |
| Cu <sub>i</sub>  | 0.95                   |
| Y <sub>i</sub>   | 0.91                   |
| Ag <sub>i</sub>  | 2.81                   |
| La <sub>i</sub>  | 0.20                   |
| Nd <sub>i</sub>  | 6.42                   |
| Eu <sub>i</sub>  | 0.24                   |
| Gd <sub>i</sub>  | 0.65                   |
| Tm <sub>i</sub>  | 0.93                   |
| Yb <sub>i</sub>  | 0.07                   |
| Hf <sub>i</sub>  | 1.12                   |
| Au <sub>i</sub>  | 0.30                   |
| Hg <sub>i</sub>  | 0.93                   |
